# Supplementary material for: Modulation of active surface sites on Ni–Fe–S by the dynamic hydrogen bubble template method for energy-saving hydrogen production
Source: Royal Society of Chemistry journal article supplement (doi:10.1039/d3ta07379c), 2024-01-01
Supplement: d3ta07379c1.pdf [file d3ta07379c1.pdf]

## Supporting Information

# Modulation of active surface sites on Ni-Fe-S by dynamic hydrogen bubble template method for energy-saving hydrogen production

Amirreza Fathollahi <sup>a</sup>, Taghi Shahrabi <sup>a,\*</sup>, Ghasem Barati Darband <sup>b,\*</sup>

<sup>a</sup> Department of Materials Engineering, Faculty of Engineering, Tarbiat Modares University,  
P.O. Box: 14115-143, Tehran, Iran

<sup>b</sup> Materials and Metallurgical Engineering Department, Faculty of Engineering, Ferdowsi  
University of Mashhad, Mashhad 91775-1111, Iran

\*Corresponding authors.

Email addresses: [tshahrabi34@modares.ac.ir](mailto:tshahrabi34@modares.ac.ir) (T. Shahrabi),

[baratidarband@um.ac.ir](mailto:baratidarband@um.ac.ir) (Gh. Barati Darband)

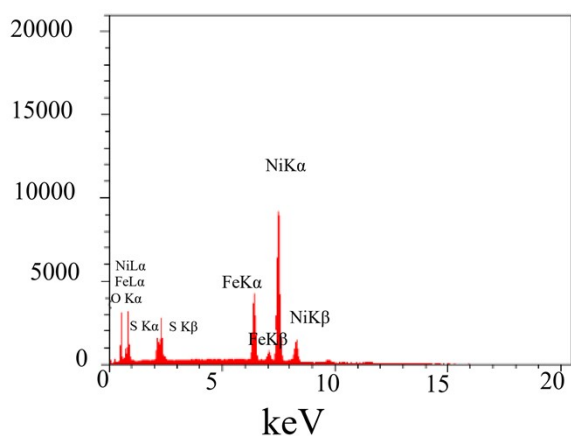

| Element | Wt.%  | At.%  |
|---------|-------|-------|
| Ni      | 55.28 | 37.76 |
| Fe      | 19.77 | 14.20 |
| S       | 11.56 | 14.46 |
| O       | 13.39 | 33.58 |

**Figure S1.** EDS spectrum of optimum Ni-Fe-S 5 A.cm<sup>-2</sup>/10 s/0.1 M.

**Table S1.** The pore diameters for different electrodes.

| Catalyst                                 | Pore Diameter ( $\mu\text{m}$ ) |
|------------------------------------------|---------------------------------|
| Ni-Fe-S 1 A.cm <sup>-2</sup> /10 s/0.1 M | 1                               |
| Ni-Fe-S 2 A.cm <sup>-2</sup> /10 s/0.1 M | 1 - 2                           |
| Ni-Fe-S 3 A.cm <sup>-2</sup> /10 s/0.1 M | 2 - 10                          |
| Ni-Fe-S 6 A.cm <sup>-2</sup> /10 s/0.1 M | 10 - 50                         |
| Ni-Fe-S 5 A.cm <sup>-2</sup> /3 s/0.1 M  | 5 - 7                           |
| Ni-Fe-S 5 A.cm <sup>-2</sup> /5 s/0.1 M  | 8 - 15                          |
| Ni-Fe-S 5 A.cm <sup>-2</sup> /30 s/0.1 M | 10 - 40                         |
| Ni-Fe-S 5 A.cm <sup>-2</sup> /10 s/0 M   | 5 - 15                          |
| Ni-Fe-S 5 A.cm <sup>-2</sup> /10 s/0.2 M | 15 - 30                         |
| Ni-Fe-S 5 A.cm <sup>-2</sup> /10 s/0.3 M | 15 - 30                         |
| Ni-Fe-S 5 A.cm <sup>-2</sup> /10 s/0.1 M | 10 - 25                         |

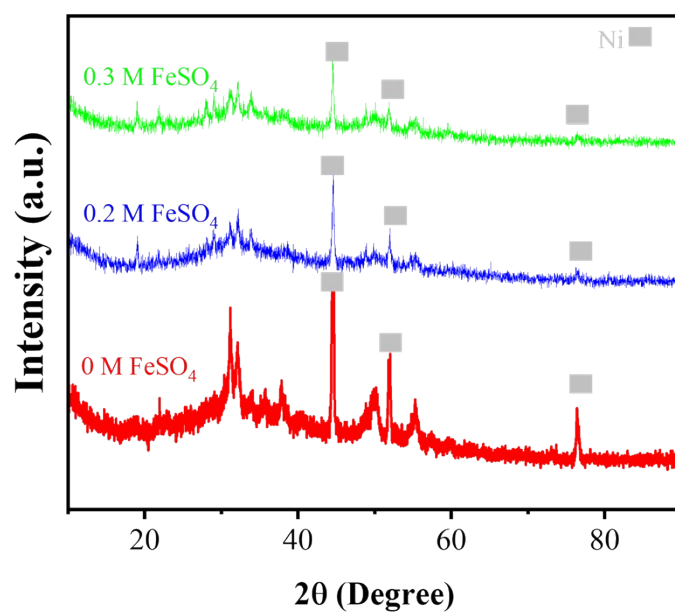

**Figure S2.** XRD pattern for electrodes with different concentration of  $\text{FeSO}_4$ .

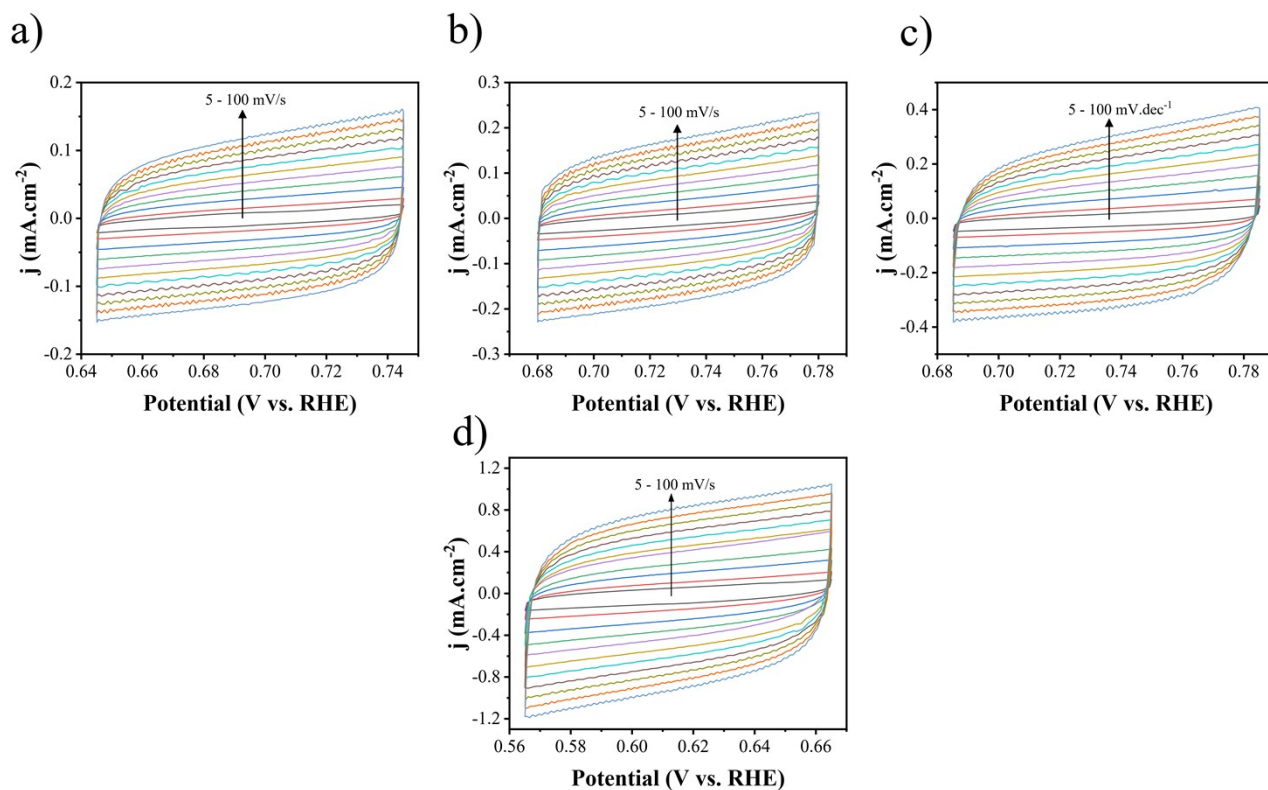

**Figure S3.** CV curves with different scan rates from 5-100  $\text{mV}\cdot\text{s}^{-1}$  of samples electrodeposited with applied current density of (a) 1, (b) 2, (c) 3, (d) 6  $\text{A}\cdot\text{cm}^{-2}$ .

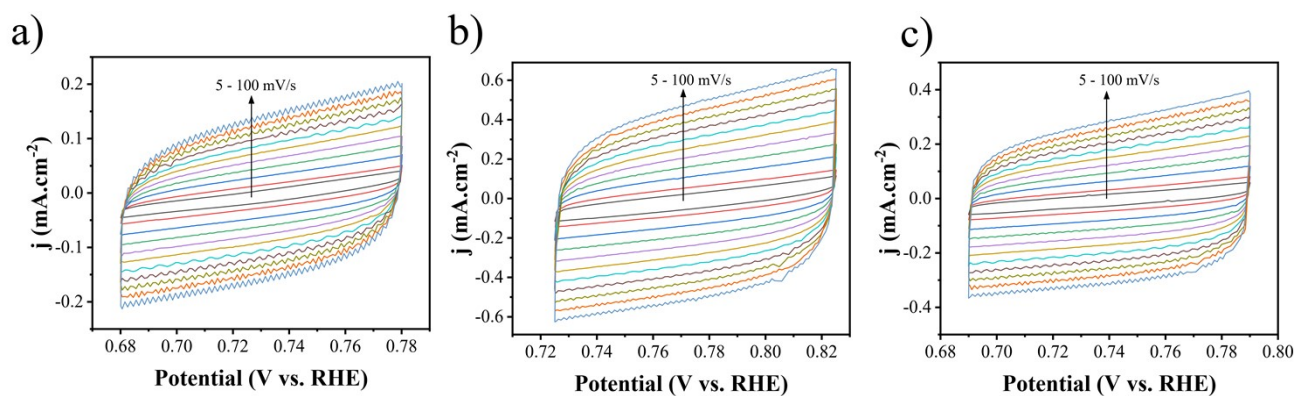

**Figure S4.** CV curves with different scan rates from 5-100  $\text{mV}\cdot\text{s}^{-1}$  of samples electrodeposited with duration time of (a) 3, (b) 5, (c) 30 s.

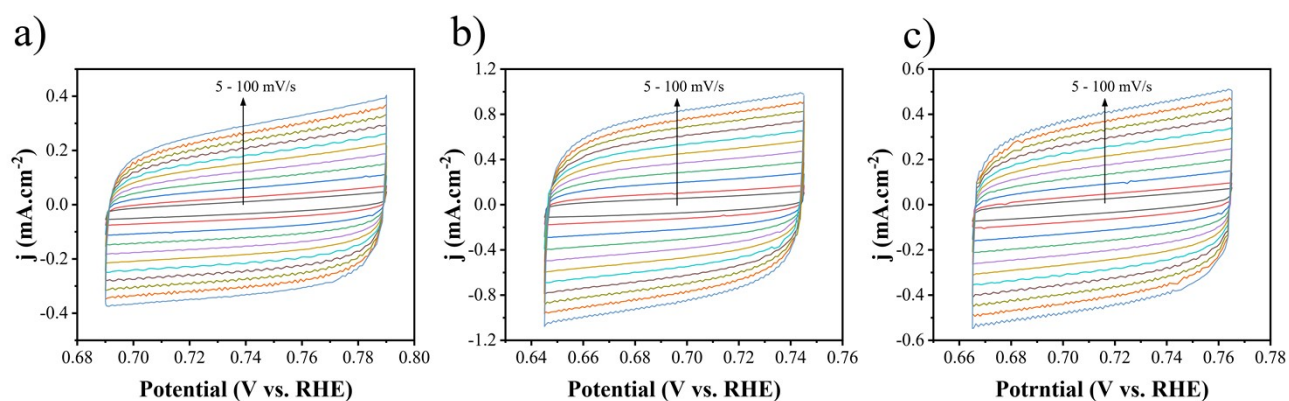

**Figure S5.** CV curves with different scan rates from 5-100  $\text{mV}\cdot\text{s}^{-1}$  of samples electrodeposited with  $\text{FeSO}_4$  concentration of (a) 0, (b) 0.2, (c) 0.3 M.

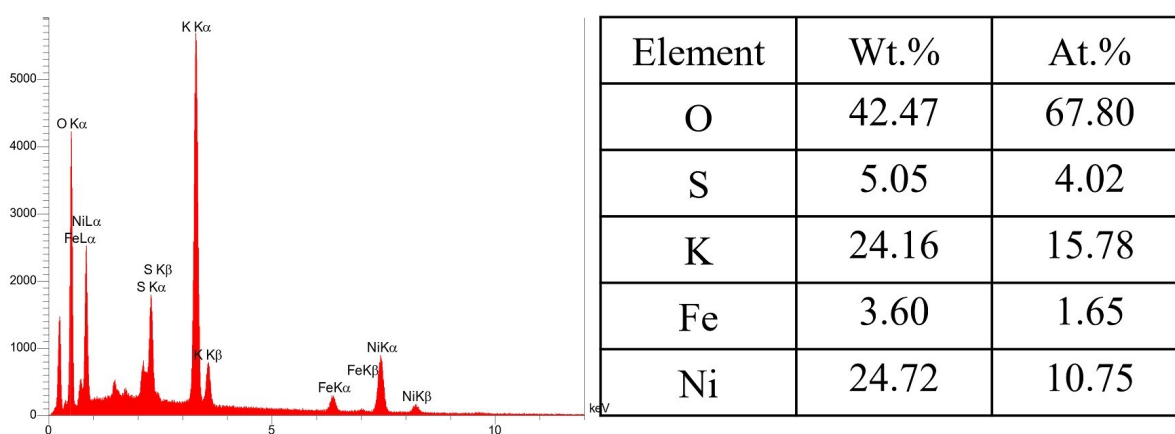

**Figure S6.** EDS spectrum of optimum Ni-Fe-S 5  $\text{A}\cdot\text{cm}^{-2}/10$  s/0.1 M after CP test.

**Table S2.** Comparison table of HER performances for electrocatalysts: this work vs. literatures.

| Catalyst | Electrolyte          | $\eta_{10}$<br>(mV vs. RHE) | Tafel slope<br>( $\text{mV}\cdot\text{dec}^{-1}$ ) | Ref.       |
|----------|----------------------|-----------------------------|----------------------------------------------------|------------|
| Ni-Fe-S  | 1 M KOH + 0.5 M Urea | 85                          | 50                                                 | This Study |

|                                                          |                                      |      |        |    |
|----------------------------------------------------------|--------------------------------------|------|--------|----|
| Ni <sub>0.7</sub> Fe <sub>0.3</sub> S <sub>2</sub>       | 1 M KOH                              | 155  | 109    | 1  |
| Ni <sub>2</sub> Fe <sub>2</sub> N/Ni <sub>3</sub> Fe     | 1 M KOH                              | 74   | 53     | 2  |
| Co-Fe-Mo-S NBs                                           | 1 M KOH                              | 300  | 104.13 | 3  |
| FeMoS                                                    | 0.5 M H <sub>2</sub> SO <sub>4</sub> | 140  | 57     | 4  |
| NiFeS                                                    | 0.5 M H <sub>2</sub> SO <sub>4</sub> | 81   | 73.1   | 5  |
| NiFeMoS/NF                                               | 1 M KOH                              | 100  | 121    | 6  |
| FeNi-S <sub>x</sub> @MoS <sub>2</sub>                    | 1 M KOH                              | 155  | 93     | 7  |
|                                                          | 0.5 M H <sub>2</sub> SO <sub>4</sub> | 110  | 34     |    |
| NiFe                                                     | 1 M KOH                              | 124  | 114    | 8  |
| CoS <sub>2</sub> HNs                                     | 1 M KOH                              | 215  | 198    | 9  |
| 1T <sub>0.81</sub> - MoS <sub>2</sub> @Ni <sub>2</sub> P | 1 M KOH                              | 95   | 42     | 10 |
| MoS <sub>2</sub> /Ni <sub>3</sub> S <sub>2</sub>         | 1 M KOH                              | 89   | 62     | 11 |
| NiFeS                                                    | 1 M KOH                              | 51.4 | 54.3   | 12 |
| NiFe/NF                                                  | 1 M KOH                              | 142  | 133    | 13 |
| Ni-Fe-P/Cu                                               | 1 M KOH                              | 335  | 63.7   | 14 |
| Fe-Ni-Co                                                 | 1 M KOH                              | 134  | 80     | 15 |
| Ni-Fe-P/NF                                               | 1 M KOH                              | 192  | 142.2  | 16 |
| Ni-Fe-B/NF                                               | 1 M KOH                              | 63   | 56.3   | 17 |
| NiFeS/C                                                  | 1 M KOH                              | 115  | 108    | 18 |
| NiFeSe/NF                                                | 1 M KOH                              | 117  | 86.5   | 19 |
| MOF-Ni@MOF-Fe-S                                          | 1 M KOH + 0.5 M Urea                 | 145  | 45.49  | 20 |
| Cu <sub>2</sub> S@Ni <sub>3</sub> Se <sub>2</sub>        | 1 M KOH + 0.5 M Urea                 | 106  | 85     | 21 |
| SnS/SnS <sub>2</sub>                                     | 1 M KOH + 0.33 M Urea                | 170  | 74     | 22 |
| NiCuP                                                    | 1 M KOH                              | 175  | 53     | 23 |
| NiCo                                                     | 1 M KOH                              | 54   | -      | 24 |

**Table S3.** Comparison table of UOR and two electrode cell performances for electrocatalysts: this work vs. literatures.

| Catalyst                                          | Electrolyte           | Required potential for 10 mA.cm <sup>-2</sup> (V vs. RHE) | Required potential for 100 mA.cm <sup>-2</sup> (V vs. RHE) | V <sub>cell</sub> required for 10 mA.cm <sup>-2</sup> (V vs. RHE) | Ref.       |
|---------------------------------------------------|-----------------------|-----------------------------------------------------------|------------------------------------------------------------|-------------------------------------------------------------------|------------|
| Ni-Fe-S                                           | 1 M KOH + 0.5 M Urea  | 1.26                                                      | 1.3                                                        |                                                                   | This Study |
| Nanoporous NiFe                                   | 1 M KOH + 0.33 M Urea | 1.33                                                      | -                                                          | 1.55                                                              | 25         |
| NiFe(OH) <sub>x</sub> /Ni <sub>3</sub> N          | 1 M KOH + 1 M Urea    | 1.36                                                      | -                                                          | -                                                                 | 26         |
| MOF-Ni@MOF-Fe-S                                   | 1 M KOH + 0.5 M Urea  | 1.34                                                      | -                                                          | 1.53                                                              | 20         |
| N-C doped NiFe                                    | 1 M KOH + 1 M Urea    | -                                                         | 1.37                                                       | 1.50                                                              | 27         |
| NiFe NSs/NF                                       | 1 M KOH + 0.33 M Urea | 1.33                                                      | 1.37                                                       | 1.40                                                              | 28         |
| Cu <sub>2</sub> S@Ni <sub>3</sub> Se <sub>2</sub> | 1 M KOH + 0.5 M Urea  | 1.338                                                     | -                                                          | 1.48                                                              | 21         |
| SnS/SnS <sub>2</sub>                              | 1 M KOH + 0.33 M Urea | -                                                         | 1.39                                                       | 1.36                                                              | 22         |
| Ni(OH)S nanosheets                                | 1 M KOH + 0.33 M Urea | 1.34                                                      | -                                                          | -                                                                 | 29         |
| Co-Ni-S                                           | 1 M KOH + 0.33 M Urea | 1.31                                                      | 1.35                                                       | -                                                                 | 30         |

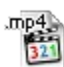

IMG\_0271.MP4

**Video S1:** Video of Ni-Fe-S contact angle test.

## References

1. J. Yu, G. Cheng and W. Luo, *Journal of Materials Chemistry A*, 2017, **5**, 15838-15844.
2. Y. Hu, T. Xiong, M.-S. J. T. Balogun, Y. Huang, D. Adekoya, S. Zhang and Y. Tong, *Materials Today Physics*, 2020, **15**, 100267.
3. Y. Zhao, C. K. Mavrokefalos, P. Zhang, R. Erni, J. Li, C. A. Triana and G. R. Patzke, *Chemistry of Materials*, 2020, **32**, 1371-1383.
4. A. Morozan, H. Johnson, C. Roiron, G. Genay, D. Aldakov, A. Ghedjatti, C. T. Nguyen, P. D. Tran, S. Kinge and V. Artero, *ACS Catalysis*, 2020, **10**, 14336-14348.
5. A. Ma, C. Wang, Y. Lu, X. Wu, B. B. Mamba, A. T. Kuvarega, K. K. Kefeni, J. Gui and D. Liu, *ChemElectroChem*, 2020, **7**, 2199-2204.
6. K.-L. Yan, J.-F. Qin, Z.-Z. Liu, B. Dong, J.-Q. Chi, W.-K. Gao, J.-H. Lin, Y.-M. Chai and C.-G. Liu, *Chemical Engineering Journal*, 2018, **334**, 922-931.
7. S. Bolar, S. Shit, N. C. Murmu and T. Kuila, *ChemElectroChem*, 2020, **7**, 3324-3335.
8. E. Hatami, A. Toghraei and G. B. Darband, *International Journal of Hydrogen Energy*, 2021, **46**, 9394-9405.
9. C. Wang, G. Sui, D. Guo, J. Li, L. Zhang, S. Li, J. Xin, D.-F. Chai and W. Guo, *Journal of Colloid and Interface Science*, 2021, **599**, 577-585.
10. M. Liu, J.-A. Wang, W. Klysubun, G.-G. Wang, S. Sattayaporn, F. Li, Y.-W. Cai, F. Zhang, J. Yu and Y. Yang, *Nature Communications*, 2021, **12**, 5260.
11. L. Zhang, Y. Zheng, J. Wang, Y. Geng, B. Zhang, J. He, J. Xue, T. Frauenheim and M. Li, *Small*, 2021, **17**, 2006730.
12. X. Yang, R. Qiu, M.-J. Lan, G. Chen, W. Xu and Y. Shen, *International Journal of Hydrogen Energy*, 2022, **47**, 36556-36565.
13. Z. Zhang, Y. Wu and D. Zhang, *International Journal of Hydrogen Energy*, 2022, **47**, 1425-1434.
14. J. Lian, Y. wu, H. Zhang, S. Gu, Z. Zeng and X. Ye, *International Journal of Hydrogen Energy*, 2018, **43**, 12929-12938.
15. S. Jiang, L. Zhu, Z. Yang and Y. Wang, *International Journal of Hydrogen Energy*, 2021, **46**, 36731-36741.
16. X. Zhang, N. Chen, Y. Wang, G. Wu and X. Du, *International Journal of Hydrogen Energy*, 2020, **45**, 22921-22928.
17. W. Hong, S. Sun, Y. Kong, Y. Hu and G. Chen, *Journal of Materials Chemistry A*, 2020, **8**, 7360-7367.
18. Z. Yin, S. Zhang, J. Li, S. Ma, W. Chen, X. Ma, Y. Zhou, Z. Zhang and X. Wang, *New Journal of Chemistry*, 2021, **45**, 12996-13003.
19. X. Hu, Q. Zhou, P. Cheng, S. Su, X. Wang, X. Gao, G. Zhou, Z. Zhang and J. Liu, *Applied Surface Science*, 2019, **488**, 326-334.
20. H. Xu, K. Ye, K. Zhu, J. Yin, J. Yan, G. Wang and D. Cao, *Dalton Transactions*, 2020, **49**, 5646-5652.
21. L. Lv, Z. Li, H. Wan and C. Wang, *Journal of Colloid and Interface Science*, 2021, **592**, 13-21.
22. S. A. Patil, N. K. Shrestha, A. I. Inamdar, C. Bathula, J. Jung, H. Im and H. Kim, *International Journal of Energy Research*, 2022, **46**, 15143-15155.
23. M. Asnavandi, B. H. R. Suryanto, W. Yang, X. Bo and C. Zhao, *ACS Sustainable Chemistry & Engineering*, 2018, **6**, 2866-2871.
24. J. Wang, H. Shao, S. Ren, A. Hu and M. Li, *Applied Surface Science*, 2021, **539**, 148045.

25. Z. Cao, T. Zhou, X. Ma, Y. Shen, Q. Deng, W. Zhang and Y. Zhao, *ACS Sustainable Chemistry & Engineering*, 2020, **8**, 11007-11015.
26. H. Zhang, X. Meng, J. Zhang and Y. Huang, *ACS Sustainable Chemistry & Engineering*, 2021, **9**, 12584-12590.
27. J. Zhang, F. Xing, H. Zhang and Y. Huang, *Dalton Transactions*, 2020, **49**, 13962-13969.
28. Y. Diao, Y. Liu, G. Hu, Y. Zhao, Y. Qian, H. Wang, Y. Shi and Z. Li, *Biosensors and Bioelectronics*, 2022, **211**, 114380.
29. X. Jia, H. Kang, X. Yang, Y. Li, K. Cui, X. Wu, W. Qin and G. Wu, *Applied Catalysis B: Environmental*, 2022, **312**, 121389.
30. Z. Xu, Q. Chen, Q. Chen, P. Wang, J. Wang, C. Guo, X. Qiu, X. Han and J. Hao, *Journal of Materials Chemistry A*, 2022, **10**, 24137-24146.
